# Supplementary material for: Individual Treatment of Posttraumatic Stress Disorder Using Mantram Repetition: A Randomized Clinical Trial
Source: Atypon-hosted journal article supplement (doi:10.1176/appi.ajp.2018.17060611), 2018-06-20
Supplement: appi.ajp.2018.17060611.ds001.pdf [file appi.ajp.2018.17060611.ds001.pdf]

 


Psychiatry Online
